# Supplementary material
Source: PubMed Central journal article supplement (PMC10992433)
Supplement: 262_2020_2787_MOESM2_ESM.pdf [file 262_2020_2787_MOESM2_ESM.pdf]

Supplementary table 1: General characteristic of included patients

| VARIABLES                    | AGE GROUP |           |                | EBV-STATUS            |                         |                     |
|------------------------------|-----------|-----------|----------------|-----------------------|-------------------------|---------------------|
|                              | ≤10 YEARS | >10 YEARS | p <sup>a</sup> | EBV+                  | EBV-                    | p                   |
| <b>Age*</b>                  | 41(51%)   | 30 (38%)  | -              | 2-16 (8) <sup>b</sup> | 5-20 ( 12) <sup>b</sup> | 0.0008 <sup>c</sup> |
| <b>Gender</b>                |           |           |                |                       |                         |                     |
| <b>Male</b>                  | 35(85%)   | 24(80%)   | 0.783          | 47(85%)               | 20 (81%)                | 0.774 <sup>a</sup>  |
| <b>Female</b>                | 6(15%)    | 6 (20%)   |                | 8 (15%)               | 5(19%)                  |                     |
| <b>Histological Subtype</b>  |           |           |                |                       |                         |                     |
| <b>Nodular sclerosis</b>     | 7 (18%)   | 12 (43%)  | 0.033          | 13 (28%)              | 14 (63%)                | 0.003 <sup>a</sup>  |
| <b>Mixed cellularity</b>     | 26 (67%)  | 11 (39%)  |                | 33 (66%)              | 6(23%)                  |                     |
| <b>Others (LR and LD) **</b> | 1 (15%)   | 2 (18%)   |                | 1 (6%)                | 2 (14%)                 |                     |

EBV: Epstein-Barr virus. <sup>a</sup> p-value originated from Fisher's exact test. <sup>b</sup> Mean value. <sup>c</sup> p-value originated from Mann-Whitney test. When it is not specified, the numbers represent number of cases. \* Age was not available in 9 cases. \*\* Histological subtype was not available in 11 cases. Histological subtypes were compared between MC and NS for Fisher's exact test.

Supplementary table 2: Mean values for +cells/mm2 are expressed in EBV+ and EBV- cases and in patients younger and older than 10 years.

| VARIABLES  |            | IL10+/mm2 | TGFβ+/mm2 | PD1+/mm2 | PDL1+mic/mm2 | PDL1+HRS/mm2 |
|------------|------------|-----------|-----------|----------|--------------|--------------|
| EBV STATUS | EBV+       | 52.3      | 63.2      | 62.6     | 171.3        | 7.5          |
|            | EBV-       | 41.1      | 46.1      | 50.4     | 116.5        | 2.4          |
| AGE GROUPS | < 10 years | 52.2      | 55.0      | 68.5     | 147.4        | 6.7          |
|            | > 10 years | 48.5      | 63.7      | 49.2     | 149.5        | 5.5          |
