# Supplementary material
Source: PubMed Central journal article supplement (PMC10992433)

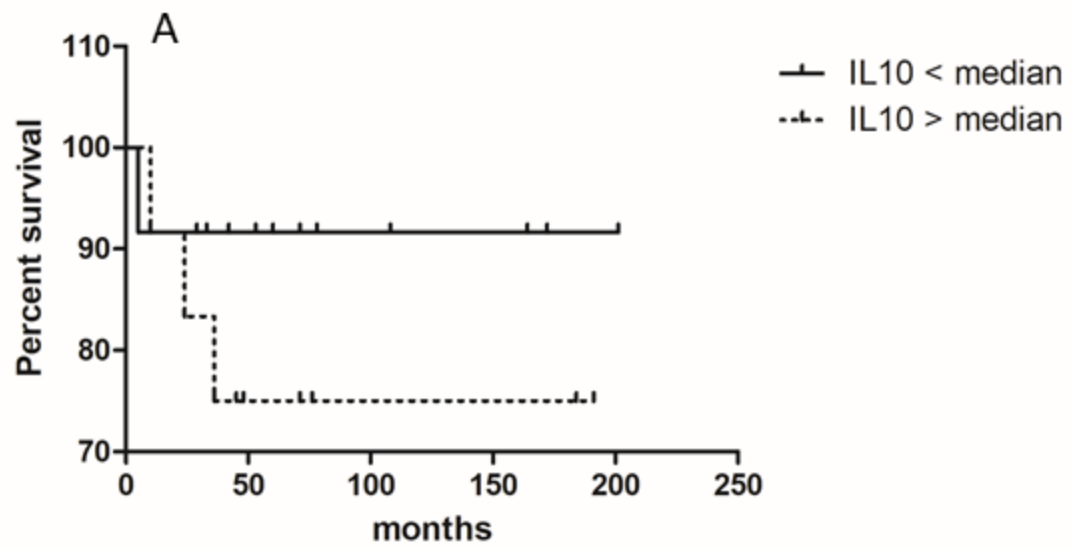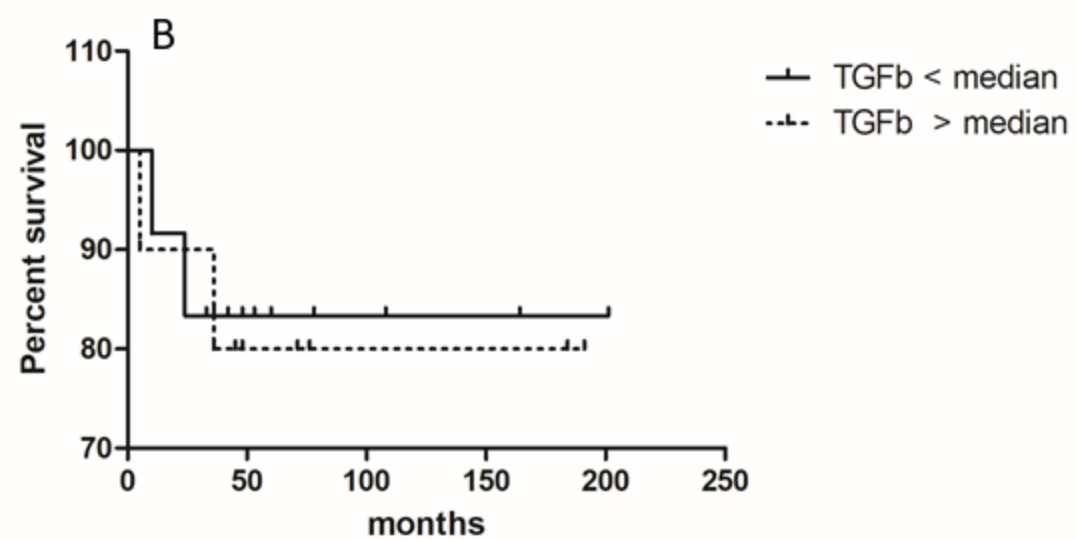

Supplement: 262_2020_2787_MOESM1_ESM.pdf [file 262_2020_2787_MOESM1_ESM.pdf]
